# Supplementary material for: Requirement of IFT-B–BBSome complex interaction in export of GPR161 from cilia
Source: PubMed Central journal article supplement (PMC6777367; doi:10.1242/bio.043786), 2019-08-30
Supplement: biolopen-8-043786-s1.pdf [file biolopen-8-043786-s1.pdf]

Supplementary information

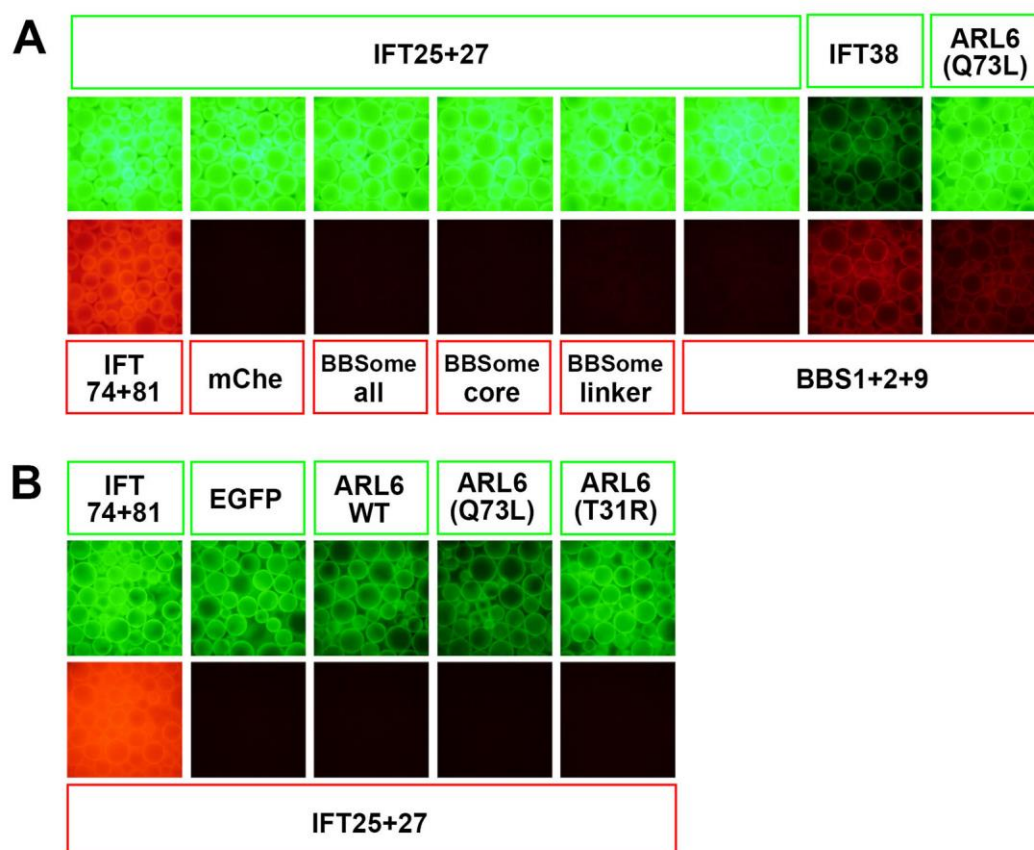

**Fig. S1 Failed detection of an interaction of IFT25–IFT27 with the BBSome or ARL6 by the VIP assay**

(A) Failed detection of an interaction of IFT25–IFT27 with the BBSome subunits. Lysates from HEK293T cells coexpressing EGFP-fused IFT25+IFT27, IFT38 or ARL6 $\Delta$ 15(Q73L) and mChe-fused BBSome subunits as indicated or IFT74+IFT81 as a positive control were subjected to the VIP assay. (B) Failed detection of an interaction of IFT25–IFT27 with ARL6. HEK293T cells coexpressing mChe-fused IFT25+IFT27 and EGFP-fused ARL6(WT), ARL6(Q73L), or ARL6(T31R) or IFT74+IFT81 as a positive control were subjected to the VIP assay.

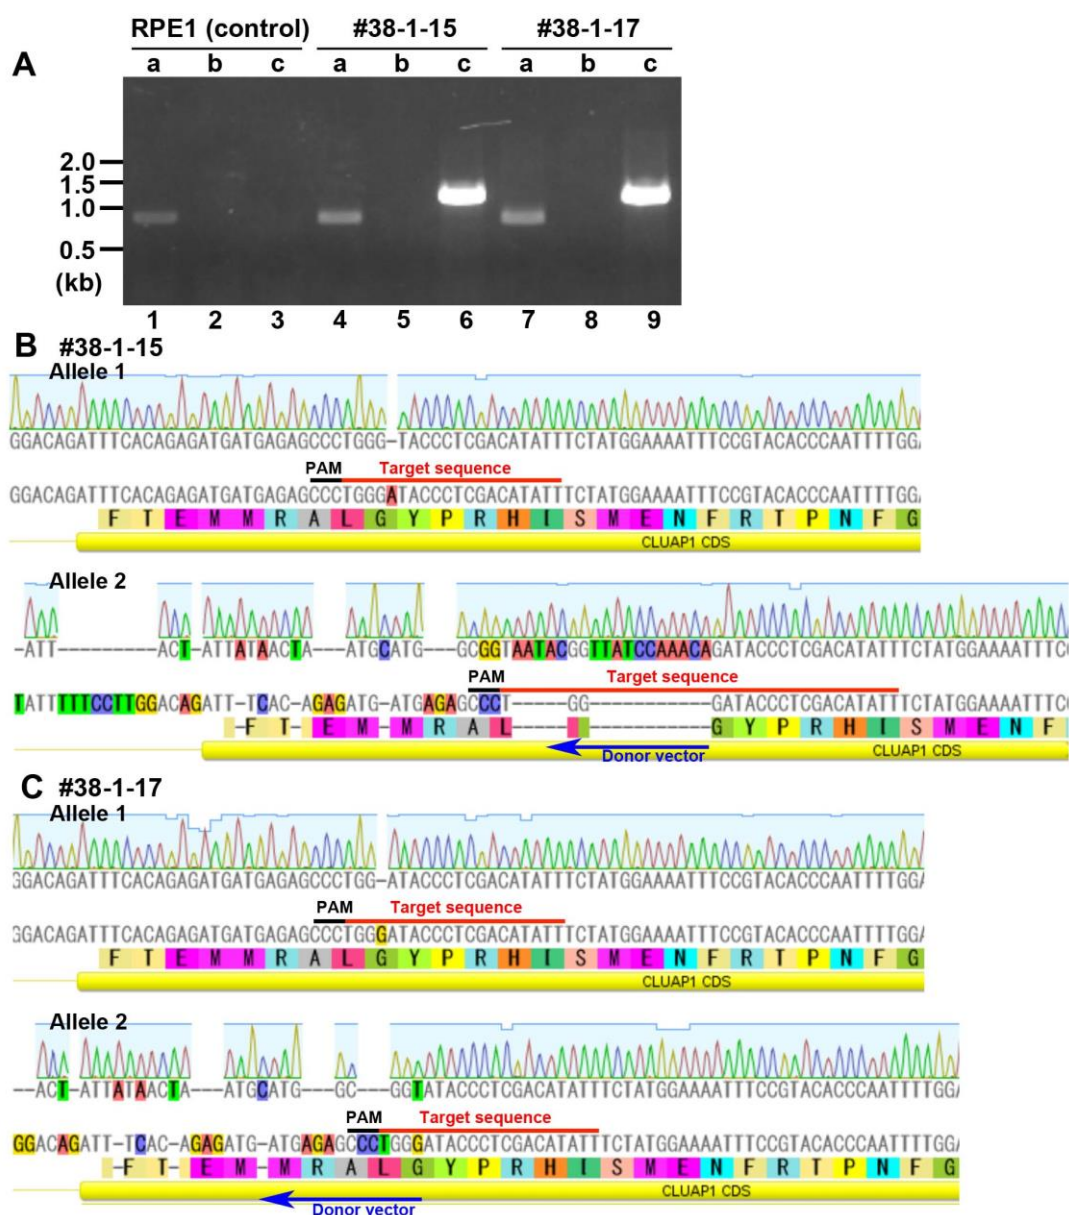

**Fig. S2. Genomic PCR and sequence analyses of the *IFT38*-KO cell lines**

Genomic DNAs extracted from control hTERT-RPE1 cells and from the *IFT38*-KO cell lines #38-1-15 and #38-1-17, which were established using a donor knock-in vector containing the target sequence, were subjected to PCR analysis using the indicated primer sets (see Table S2) to detect alleles with a small indel or no insertion (a), or with forward (b) or reverse (c) integration of the donor knock-in vector. (B and C) Alignments of allele sequences of the #38-1-15 (B) and #38-1-17 (C) cell lines determined by sequencing of the PCR products shown in (A). Red and black lines indicate the target sequence and PAM sequence, respectively, and blue arrows indicate the direction of integration of the donor knock-in vector.

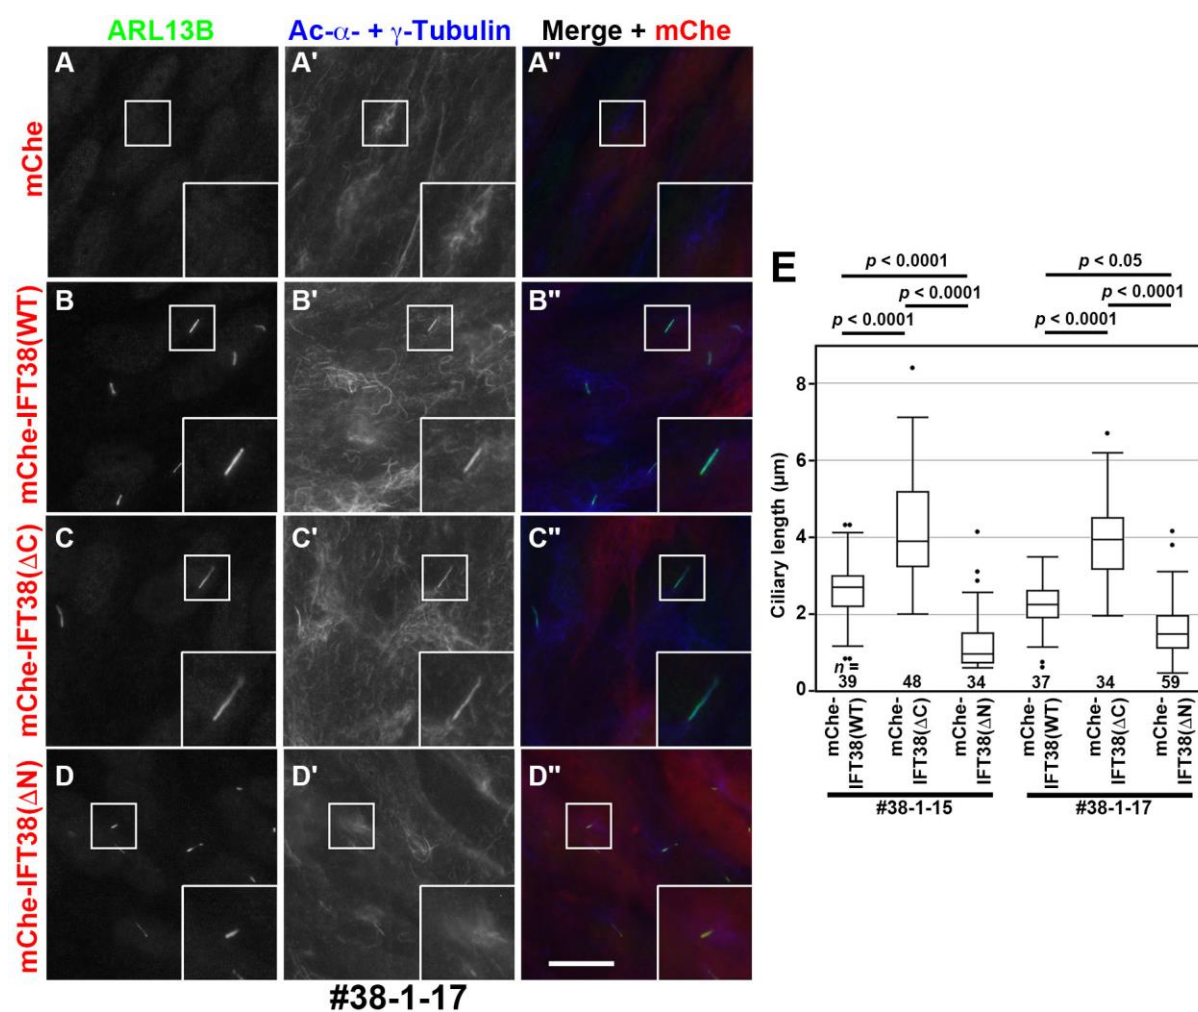

**Fig. S3. Differential phenotypes of IFT38-KO cells expressing IFT38(WT), IFT38( $\Delta$ C), and IFT38( $\Delta$ N)**

(A–D) The *IFT38*-KO cell line #38-1-17, which stably expresses mChe (A), mChe-IFT38(WT) (B), IFT38( $\Delta$ C) (C), or mChe-IFT38( $\Delta$ N) (D) were immunostained for ARL13B (A–D) and Ac- $\alpha$ -tubulin+ $\gamma$ -tubulin (A'–D'). Scale bar, 10  $\mu$ m. (E) The length of cilia in the *IFT38*-KO cell lines #38-1-15 and #38-1-17, which stably express mChe, mChe-IFT38(WT), mChe-IFT38( $\Delta$ C), or mChe-IFT38( $\Delta$ N) was measured and expressed as box-and-whisker plots as in Fig. 3H. *p*-values were determined by one-way ANOVA followed by Tukey post-hoc analysis.

**Table S1 Plasmid vectors used in this study**

| Vector         | Insert                               | Reference            |
|----------------|--------------------------------------|----------------------|
| pEGFP-C1       | Mouse IFT38                          | Katoh et al. (2016)  |
| pEGFP-C1       | Mouse IFT38( $\Delta$ C: 1–328)      | Katoh et al. (2016)  |
| pEGFP-C1       | Mouse IFT38( $\Delta$ N: 120–413)    | Katoh et al. (2016)  |
| pEGFP-C1       | Mouse IFT38(NN-CH: 1–119)            | Katoh et al. (2016)  |
| pEGFP-C1       | Mouse IFT38(CC: 120–328)             | Katoh et al. (2016)  |
| pEGFP-C1       | Mouse IFT38(CT: 329–413)             | Katoh et al. (2016)  |
| pTagRFP-T-C    | Human BBS1                           | Katoh et al. (2015)  |
| pTagRFP-T-C    | Human BBS2                           | Katoh et al. (2015)  |
| pTagRFP-T-C    | Human BBS4                           | Katoh et al. (2015)  |
| pTagRFP-T-C    | Human BBS5                           | Katoh et al. (2015)  |
| pTagRFP-T-C    | Human BBS7                           | Katoh et al. (2015)  |
| pTagRFP-T-C    | Human BBS8                           | Katoh et al. (2015)  |
| pTagRFP-T-C    | Human BBS9                           | Katoh et al. (2015)  |
| pTagRFP-T-C    | Human BBS18                          | Katoh et al. (2015)  |
| pcDNA3-EGFP-N  | Human ARL6                           | This study           |
| pcDNA3-EGFP-N  | Human ARL6(T31R)                     | This study           |
| pcDNA3-EGFP-N  | Human ARL6(Q73L)                     | This study           |
| pEGFP-C1       | Human ARL6( $\Delta$ N: 17–186,Q73L) | Nozaki et al. (2018) |
| pTagRFP-T-C    | Human ARL6( $\Delta$ N: 17–186,Q73L) | Nozaki et al. (2018) |
| pCAG-mCherry-C | Human BBS2                           | This study           |
| pCAG-mCherry-C | Human BBS1                           | This study           |
| pCAG-mCherry-C | Human BBS9                           | This study           |
| pEGFP-N1       | Human IFT20                          | Katoh et al. (2016)  |
| pEGFP-C1       | Human IFT22                          | Katoh et al. (2016)  |
| pEGFP-C1       | Human IFT25                          | Katoh et al. (2016)  |
| pEGFP-C1       | Human IFT27                          | Katoh et al. (2016)  |
| pCAG-EGFP-C    | Human IFT46                          | Katoh et al. (2016)  |
| pCAG-EGFP-C    | Human IFT52                          | Katoh et al. (2016)  |
| pEGFP-C1       | Human IFT54                          | Katoh et al. (2016)  |
| pCAG-EGFP-C    | Human IFT56                          | Katoh et al. (2016)  |
| pEGFP-C1       | Human IFT57                          | Katoh et al. (2016)  |
| pCAG-EGFP-C    | Human IFT70B                         | Katoh et al. (2016)  |

|                      |                                   |                      |
|----------------------|-----------------------------------|----------------------|
| pCAG-EGFP-C          | Human IFT74                       | Katoh et al. (2016)  |
| pCAG-EGFP-C          | Human IFT80                       | Katoh et al. (2016)  |
| pCAG-EGFP-C          | Human IFT81                       | Katoh et al. (2016)  |
| pCAG-EGFP-C          | Human IFT88                       | Katoh et al. (2016)  |
| pCAG-EGFP-C          | Human IFT172                      | Katoh et al. (2016)  |
| pEGFP-C1             | Human IFT43                       | Hirano et al. (2017) |
| pCAG2-EGFP-C         | Human IFT121                      | Hirano et al. (2017) |
| pCAG2-EGFP-C         | Human IFT122                      | Hirano et al. (2017) |
| pCAG2-EGFP-C         | Human IFT139                      | Hirano et al. (2017) |
| pCAG2-EGFP-C         | Human IFT140                      | Hirano et al. (2017) |
| pCAG2-EGFP-C         | Human IFT144                      | Hirano et al. (2017) |
| pEGFP-C1             | Human TULP3                       | Hirano et al. (2017) |
| pTagRFP-T-N          | Human IFT20                       | Katoh et al. (2016)  |
| pTagRFP-T-C          | Human IFT25                       | Katoh et al. (2016)  |
| pTagRFP-T-C          | Human IFT27                       | Katoh et al. (2016)  |
| pCAG-mCherry-C       | Human IFT54                       | Katoh et al. (2016)  |
| pCAG2-mCherry-C      | Human IFT57                       | This study           |
| pCAG-mCherry-C       | Human IFT74                       | Katoh et al. (2016)  |
| pCAG-mCherry-N       | Human IFT80                       | Katoh et al. (2016)  |
| pCAG-mCherry-C       | Human IFT81                       | Katoh et al. (2016)  |
| pCAG-mCherry-C       | Human IFT88                       | Katoh et al. (2016)  |
| pRRLsinPPT-mCherry-C | Mouse IFT38                       | This study           |
| pRRLsinPPT-mCherry-C | Mouse IFT38( $\Delta$ C: 1–328)   | This study           |
| pRRLsinPPT-mCherry-C | Mouse IFT38( $\Delta$ N: 120–413) | This study           |

**Table S2 Antibodies used in this study**

| Antibody                                    | Manufacturer           | Clone or catalog number        | Dilution (purpose) |
|---------------------------------------------|------------------------|--------------------------------|--------------------|
| Monoclonal mouse anti-Ac- $\alpha$ -tubulin | Sigma-Aldrich          | 6-11B-1                        | 1:1,000 (IF)       |
| Monoclonal mouse anti- $\gamma$ -tubulin    | Sigma-Aldrich          | GTU-88                         | 1:1,000 (IF)       |
| Polyclonal rabbit anti-ARL13B               | Proteintech            | 17711-1-AP                     | 1:1,000 (IF)       |
| Polyclonal rabbit anti-IFT88                | Proteintech            | 13967-1-AP                     | 1:1,000 (IF)       |
| Polyclonal rabbit anti-IFT140               | Proteintech            | 17460-1-AP *                   | 1:500 (IF)         |
| Polyclonal rabbit anti-ARL6                 | Proteintech            | 12676-1-AP                     | 1:500 (IF)         |
| Polyclonal rabbit anti-GPR161               | Proteintech            | 13398-1-AP                     | 1:200 (IF)         |
| Polyclonal rabbit anti-BBS9                 | Atlas Antibodies       | HPA021289                      | 1:1,000 (IF)       |
| Polyclonal rabbit anti-SMO                  | Abcam                  | ab38686                        | 1:500 (IF)         |
| Monoclonal mouse anti-FGFR1OP               | Abnova                 | 2B1                            | 1:10,000 (IF)      |
| Monoclonal mouse anti-RFP                   | MBL Life Science       | 3G5                            | 1:1,000 (IF)       |
| Polyclonal rabbit anti-RFP                  | MBL Life Science       | PM005                          | 1:1,000 (IB)       |
| Polyclonal rabbit anti-mCherry              | Proteintech            | 26765-1-AP                     | 1:1,000 (IB)       |
| Monoclonal mouse anti-GFP                   | BD Biosciences         | JL-8                           | 1:1,000 (IB)       |
| AlexaFluor-conjugated secondary             | Molecular Probes       | A11034, A21240, A21147, A21242 | 1:1,000 (IF)       |
| DyLight 649-conjugated secondary            | Jackson ImmunoResearch | 115-495-209                    | 1:500 (IF)         |
| Peroxidase-conjugated secondary             | Jackson ImmunoResearch | 115-035-166, 111-035-144       | 1:3,000 (IB)       |

Notes:

IF, immunofluorescence; IB, immunoblotting

\*A new lot of the anti-IFT140 antibody (17460-1-AP) was used to detect the IFT140 protein around the ciliary base, without nonspecific staining in the nucleus, as observed in our previous studies.

**Table S3 Oligodeoxyribonucleotides used in this study**

| Name               | Sequence                       |
|--------------------|--------------------------------|
| IFT38-gRNA#1-S     | 5'-AATATGTCGAGGGTATCCCA-3'     |
| IFT38-gRNA#1-AS    | 5'-TGGGATACCCTCGACATATT-3'     |
| IFT38-gRNA#2-S     | 5'-TCAGGCGGGATGTCAGTCTG-3'     |
| IFT38-gRNA#2-AS    | 5'-CAGACTGACATCCCGCCTGA-3'     |
| IFT38-Genome-#1-S  | 5'-TGAATGTCATCCTACGGATTCCCC-3' |
| IFT38-Genome-#1-AS | 5'-AACTATGAGTGTGTACCACCCAGG-3' |
| IFT38-Genome-#2-S  | 5'-CTAATCGGCCCTAGCACTGATCTC-3' |
| IFT38-Genome-#2-AS | 5'-CCACAGAAACCCAGCAATGGAATG-3' |
| pTagBFP-N-RV2      | 5'-CGTAGAGGAAGCTAGTAGCCAGG-3'  |

### Supplementary References

**Hirano, T., Katoh, Y. and Nakayama, K.** (2017). Intraflagellar transport-A complex mediates ciliary entry and retrograde trafficking of ciliary G protein-coupled receptors. *Mol. Biol. Cell* **28**, 429-439.

**Katoh, Y., Nozaki, S., Hartanto, D., Miyano, R. and Nakayama, K.** (2015). Architectures of multisubunit complexes revealed by a visible immunoprecipitation assay using fluorescent fusion proteins. *J. Cell Sci.* **128**, 2351-2362.

**Katoh, Y., Terada, M., Nishijima, Y., Takei, R., Nozaki, S., Hamada, H. and Nakayama, K.** (2016). Overall architecture of the intraflagellar transport (IFT)-B complex containing Cluap1/IFT38 as an essential component of the IFT-B peripheral subcomplex. *J. Biol. Chem.* **291**, 10962-10975.

**Nozaki, S., Katoh, Y., Kobayashi, T. and Nakayama, K.** (2018). BBS1 is involved in retrograde trafficking of ciliary GPCRs in the context of the BBSome complex. *PLoS ONE* **13**, e0195005.
